# Supplementary material
Source: ML conference proceedings conference paper supplement (https://openaccess.thecvf.com/content/cvpr_2017/html/Jain_Creativity_Generating_Diverse_2017_CVPR_paper.html)
Supplement: Supplementary file 1 [file Jain_Creativity_Generating_Diverse_2017_CVPR_supplemental.pdf]

# Supplementary – Creativity: Generating Diverse Questions using Variational Autoencoders

Unnat Jain\*  
UIUC  
uj2@illinois.edu

Ziyu Zhang\*  
Northwestern University  
zzhang@u.northwestern.edu

Alexander Schwing  
UIUC  
aschwing@illinois.edu

## 1. Quantitative Results

In the following we present additional quantitative results, some of which were already mentioned in the paper. We report average BLEU, oracle BLEU, average METEOR, oracle METEOR, unique questions (UQ) and unseen unique questions for the VQG-COCO, the VQG-Flickr, and the VQG-Bing test sets. Fig. 1 shows the average and oracle BLEU scores for the three test sets. Fig. 2 shows the average and oracle METEOR scores for the same. For diversity metrics, Fig. 3 shows the percentage of unique questions for different sampling schemes. Fig. 4 shows the percentage of unique questions generated by our model which are unseen in training. More specifically in Tab. 1, Tab. 2, and Tab. 3 we report these metrics **averaged** over all the epochs. In Tab. 4, Tab. 5, and Tab. 6 we report the **maximum** of these metrics over all the epochs. For most of the metrics we observe a uniform distribution within  $[-20, 20]$  with 500 samples to perform best.

## 2. Qualitative Results

In Fig. 5, Fig. 6 and Fig. 7 we illustrate images and some questions that our model generated. Lighter boxes are for more *literal* questions which are based on object shape, color or count and can be easily answered by looking at the image. Darker colored boxes are for *inferential* questions, which need prior (human-like) understanding of the objects or scene. The questions with **bold ticks** (✓) are questions generated by our VQG model which never occurred during training (what we refer to as ‘unseen’ questions). We demonstrate the diversity of our model by showing a variety of literal to inferential questions as well as ‘unseen’ questions.

| Sampling | Avg. Bleu    | Oracle Bleu  | Avg. Meteor  | Oracle Meteor | UQ           | Unseen UQ   |
|----------|--------------|--------------|--------------|---------------|--------------|-------------|
| N1, 100  | <b>0.331</b> | 0.37         | <b>0.188</b> | 0.207         | 1.78         | 6.54        |
| N1, 500  | 0.328        | 0.376        | 0.187        | 0.211         | 2.04         | 7.44        |
| U10, 100 | 0.305        | 0.447        | 0.178        | 0.254         | 2.04         | 7.44        |
| U10, 500 | 0.295        | 0.468        | 0.175        | 0.269         | 12.52        | 16.22       |
| U20, 100 | 0.295        | 0.486        | 0.172        | 0.281         | 17.02        | 13.66       |
| U20, 500 | 0.283        | <b>0.519</b> | 0.168        | <b>0.307</b>  | <b>33.41</b> | <b>19.6</b> |

Table 1: VQG-COCO Summary of metrics. Metrics **averaged** over the epochs.

Within those plots we also show some failure cases. We observe our model to face one of the following challenges: *recognition*, *co-occurrence* or *natural language* based challenges. To repeat, we term failures due to incorrect recognition (attributed to weak feature learning or description) as recognition based failures. Cases where a question is incorrectly generated due to its frequent occurrence with a particular object category are called co-occurrence based failures. Generated sentences with mistakes in the language structure are referred to as natural language based failures. We give examples of each for all three datasets.

---

\* indicates equal contributions.

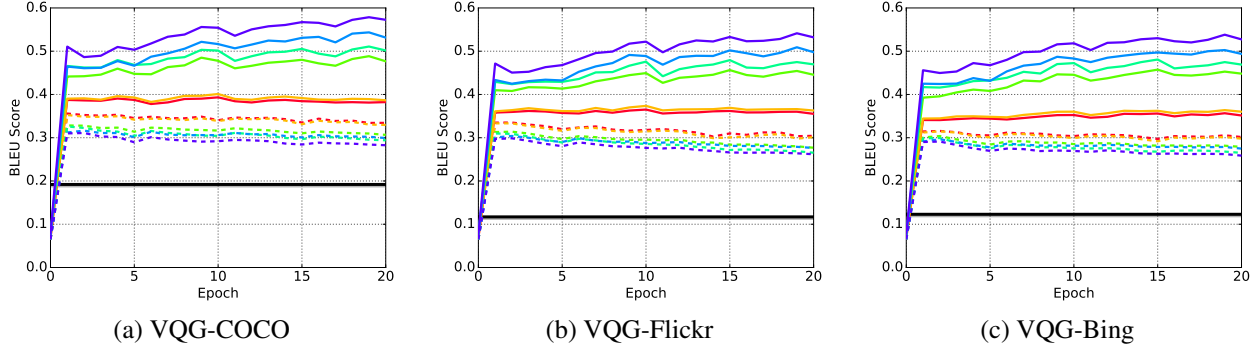

Figure 1: **BLEU Score**: Oracle-BLEU and average-BLEU score over epochs. Experiments with various sampling procedures and results compared to the performance of the baseline model [1] as line in **black bold** color. (Legend same as METEOR plots)

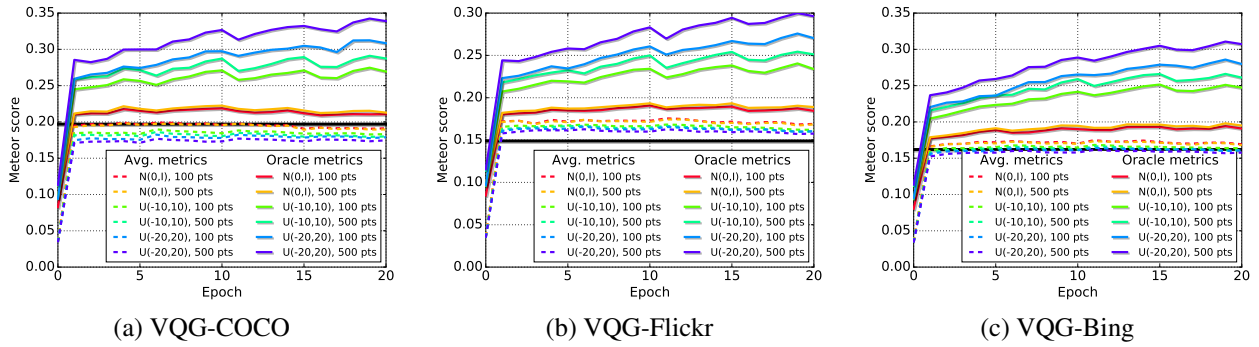

Figure 2: **METEOR Score**: Oracle-METEOR and average-METEOR score over epochs. Experiments with various sampling procedures and results compared to the performance of the baseline model [1] (line in **black** color).

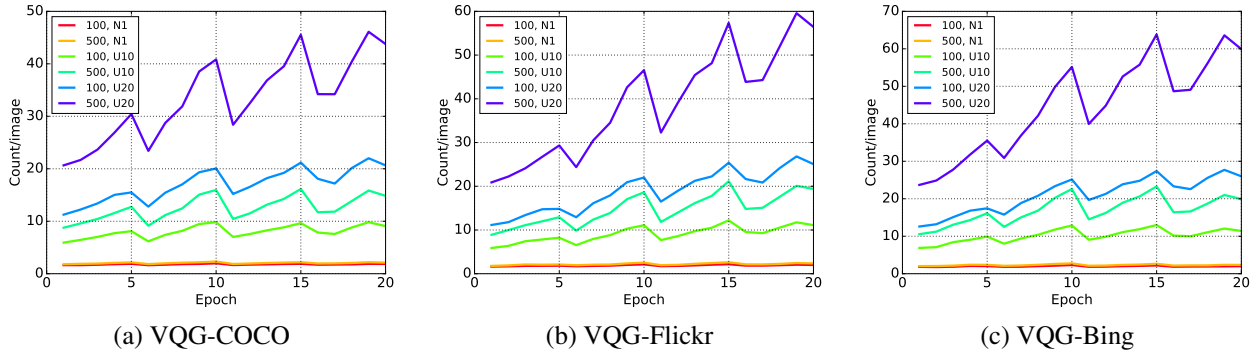

Figure 3: **Generative strength**: Number of unique questions averaged over the number of images. Shows that sampling the latent space by Uniform distribution leads to more unique questions per image.

## References

- [1] N. Mostafazadeh, I. Misra, J. Devlin, M. Mitchell, X. He, and L. Vanderwende. Generating natural questions about an image. In *Proc. ACL*, 2016. 2

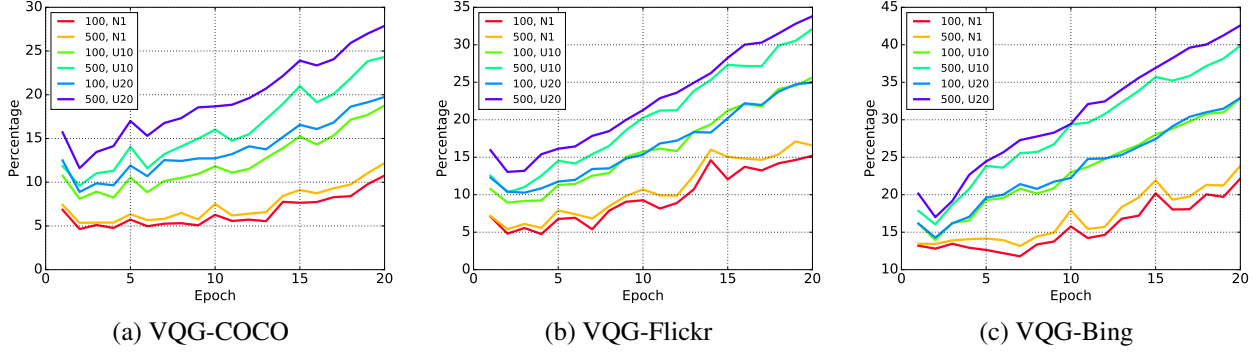

Figure 4: **Inventiveness:**  $\frac{\text{Unique questions which were never seen in training set}}{\text{Total unique questions for that image}}$  averaged over the number of images. This too suggests that sampling from the uniform distributions for the latent space generates more diverse questions.

| Sampling | Avg. Bleu    | Oracle Bleu  | Avg. Meteor  | Oracle Meteor | UQ           | Unseen UQ   |
|----------|--------------|--------------|--------------|---------------|--------------|-------------|
| N1, 100  | <b>0.305</b> | 0.346        | <b>0.165</b> | 0.181         | 1.88         | 9.64        |
| N1, 500  | 0.302        | 0.351        | <b>0.165</b> | 0.185         | 2.18         | 10.87       |
| U10, 100 | 0.283        | 0.417        | 0.160        | 0.221         | 9.07         | 16.31       |
| U10, 500 | 0.275        | 0.436        | 0.158        | 0.234         | 14.73        | 20.59       |
| U20, 100 | 0.278        | 0.453        | 0.157        | 0.245         | 18.93        | 16.66       |
| U20, 500 | 0.267        | <b>0.483</b> | 0.154        | <b>0.267</b>  | <b>39.01</b> | <b>22.6</b> |

Table 2: VQG-Flickr Summary of metrics. Metrics **averaged** over the epochs.

| Sampling | Avg. Bleu    | Oracle Bleu  | Avg. Meteor  | Oracle Meteor | UQ           | Unseen UQ    |
|----------|--------------|--------------|--------------|---------------|--------------|--------------|
| N1, 100  | <b>0.295</b> | 0.336        | <b>0.165</b> | 0.183         | 1.98         | 15.56        |
| N1, 500  | 0.292        | 0.342        | 0.164        | 0.187         | 2.31         | 17.00        |
| U10, 100 | 0.277        | 0.415        | 0.159        | 0.228         | 10.17        | 23.43        |
| U10, 500 | 0.267        | 0.436        | 0.157        | 0.242         | 16.94        | 28.83        |
| U20, 100 | 0.272        | 0.452        | 0.155        | 0.252         | 21.06        | 23.65        |
| U20, 500 | 0.261        | <b>0.482</b> | 0.152        | <b>0.273</b>  | <b>44.65</b> | <b>30.73</b> |

Table 3: VQG-Bing Summary of metrics. Metrics **averaged** over the epochs.

| Sampling | Avg. Bleu    | Oracle Bleu  | Avg. Meteor  | Oracle Meteor | UQ          | Unseen UQ    |
|----------|--------------|--------------|--------------|---------------|-------------|--------------|
| N1, 100  | <b>0.356</b> | 0.393        | <b>0.199</b> | 0.219         | 1.98        | 10.76        |
| N1, 500  | 0.352        | 0.401        | 0.198        | 0.222         | 2.32        | 12.19        |
| U10, 100 | 0.328        | 0.488        | 0.19         | 0.275         | 9.82        | 18.78        |
| U10, 500 | 0.326        | 0.511        | 0.186        | 0.291         | 16.14       | 24.32        |
| U20, 100 | 0.316        | 0.544        | 0.183        | 0.312         | 22.01       | 19.75        |
| U20, 500 | 0.311        | <b>0.579</b> | 0.177        | <b>0.342</b>  | <b>46.1</b> | <b>27.88</b> |

Table 4: VQG-COCO Summary of metrics. These metric values are the **maximum** over the epochs.

| Sampling | Avg. Bleu    | Oracle Bleu  | Avg. Meteor  | Oracle Meteor | UQ           | Unseen UQ    |
|----------|--------------|--------------|--------------|---------------|--------------|--------------|
| N1, 100  | <b>0.335</b> | 0.365        | <b>0.176</b> | 0.191         | 2.17         | 15.2         |
| N1, 500  | 0.333        | 0.374        | 0.174        | 0.193         | 2.63         | 17.1         |
| U10, 100 | 0.314        | 0.456        | 0.168        | 0.241         | 12.21        | 25.65        |
| U10, 500 | 0.31         | 0.479        | 0.167        | 0.254         | 21.14        | 32.12        |
| U20, 100 | 0.304        | 0.509        | 0.166        | 0.276         | 26.83        | 24.98        |
| U20, 500 | 0.299        | <b>0.541</b> | 0.163        | <b>0.3</b>    | <b>59.57</b> | <b>33.81</b> |

Table 5: VQG-Flickr Summary of metrics. These metric values are the **maximum** over the epochs.

| Sampling | Avg. Bleu    | Oracle Bleu  | Avg. Meteor  | Oracle Meteor | UQ           | Unseen UQ    |
|----------|--------------|--------------|--------------|---------------|--------------|--------------|
| N1, 100  | <b>0.316</b> | 0.357        | <b>0.175</b> | 0.194         | 2.32         | 22.15        |
| N1, 500  | 0.315        | 0.364        | 0.173        | 0.198         | 2.76         | 22.87        |
| U10, 100 | 0.304        | 0.457        | 0.168        | 0.252         | 12.99        | 32.84        |
| U10, 500 | 0.299        | 0.481        | 0.166        | 0.266         | 23.3         | 39.84        |
| U20, 100 | 0.296        | 0.503        | 0.164        | 0.286         | 27.71        | 32.91        |
| U20, 500 | 0.291        | <b>0.538</b> | 0.161        | <b>0.311</b>  | <b>63.83</b> | <b>42.58</b> |

Table 6: VQG-Bing Summary of metrics. These metric values are the **maximum** over the epochs.

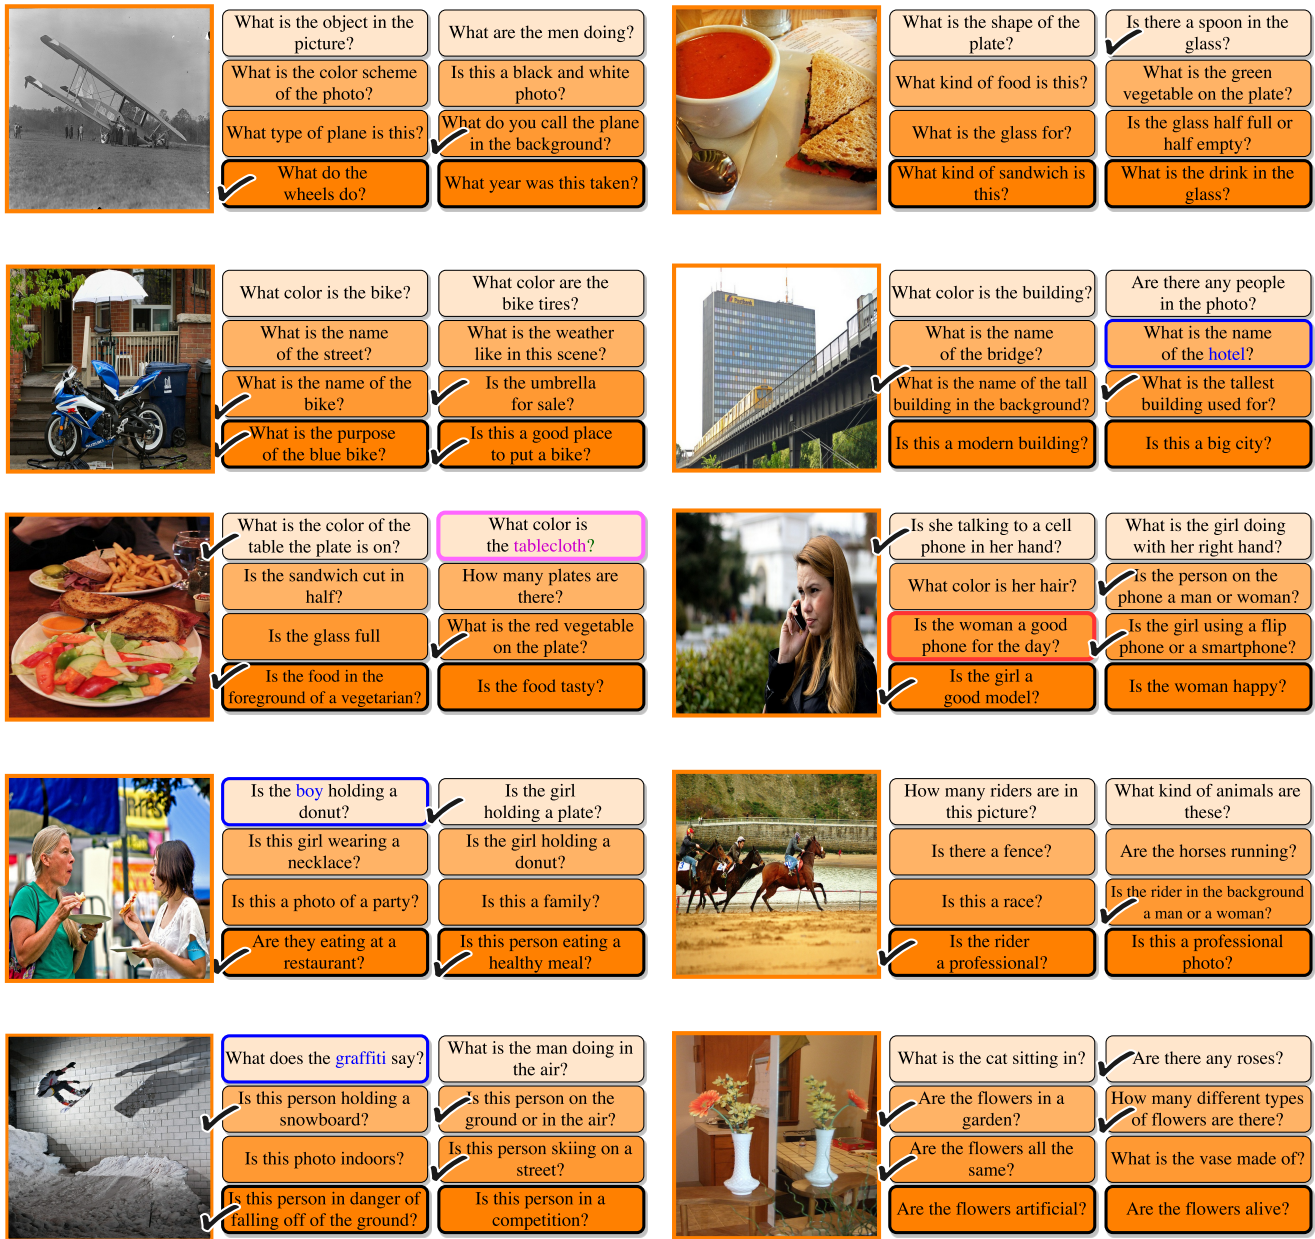

Figure 5: Examples of VQG-COCO with more questions, generated by our VQG algorithm. Darker colored boxes contain questions which are more inferential.

*Recognition based failures (blue box):* Due to similar appearance a woman is recognized as a boy and in another image the shadow on a wall is recognized as graffiti.

*Co-occurrence based failure (pink box):* Frequent occurrence of tablecloth based questions with food images generates a similar question in this image, even without a tablecloth.

*Natural language based failure (red box):* Correct subjects like woman, phone and day are combined in an incorrect language structure.



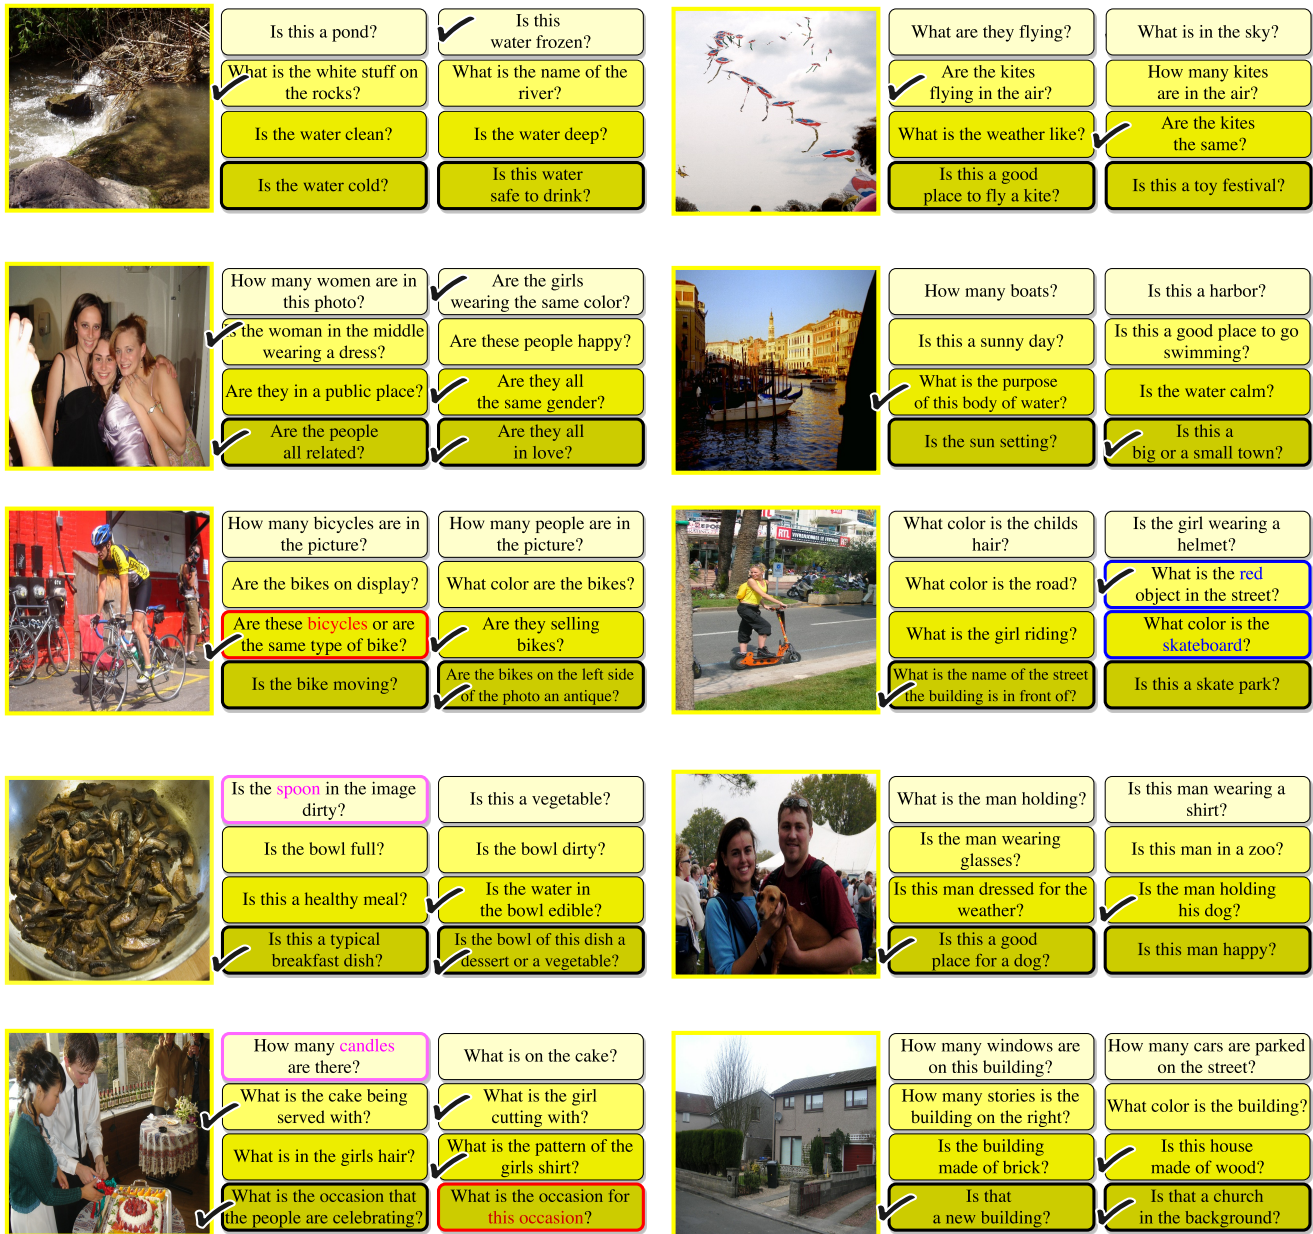

Figure 6: Examples of VQG-Flickr with more questions, generated by our VQG algorithm. Darker colored boxes contain questions which are more inferential.

*Recognition based failures (blue box):* An orange scooter is perceived as a red skateboard in one of the images.

*Co-occurrence based failures (pink box):* Frequent occurrence of spoon based questions with food images generates a similar question in one of the images, which doesn't even have a spoon. Similar is the case for candle questions in birthday images. This cake doesn't have a candle.

*Natural language based failures (red box):* Correct subject like bicycles is incorrectly framed in a question. Similar is the case with word 'occasion' in the birthday image.

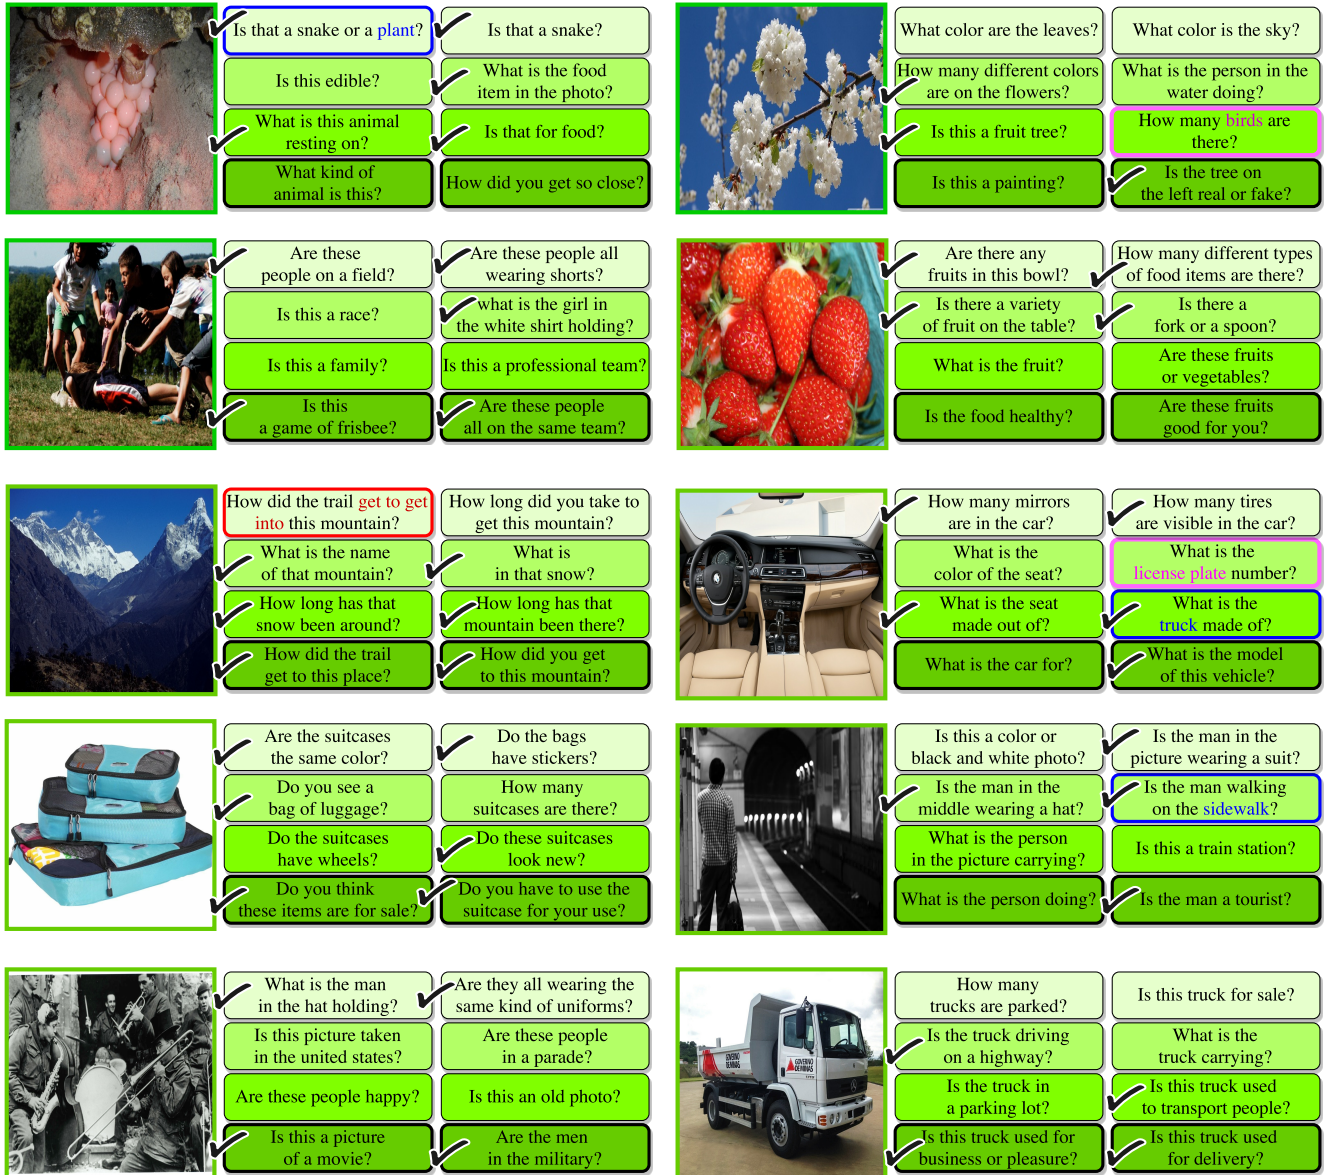

Figure 7: Examples of VQG-Bing with more questions, generated by our VQG algorithm. Darker colored boxes contain questions which are more inferential.

**Recognition based failures (blue box):** Image on the top left (which is difficult for even humans to recognize) is of a tortoise/turtle with its eggs. The image looks very similar to objects like grapes, vines, snakes. We observe a recognition based failure for the image with a train station. The dark track and platform are recognized as road and sidewalk respectively.

**Co-occurrence based failures (pink box):** Frequent occurrence of bird based questions with tree images generates a similar question in one of the images, which doesn't even have a bird. Similarly, license plate question pops up in the car image. This car view doesn't have a license plate view.

**Natural language based failures (red box):** Correct subjects like trail and mountains are incorrectly framed in a question.
